# Supplementary material for: A Theoretical Study of the Relationship between the Electrophilicity ω Index and Hammett Constant σp in [3+2] Cycloaddition Reactions of Aryl Azide/Alkyne Derivatives
Source: Molecules. 2016 Oct 27;21(11):1434. doi: 10.3390/molecules21111434 (PMC6273986; doi:10.3390/molecules21111434)
Supplement: Supplementary file 1 [file molecules-21-01434-s001.pdf]

# Supplementary Materials: A Theoretical Study of the Relationship between the Electrophilicity $\omega$ Index and Hammett Constant $\sigma_p$ in [3+2] Cycloaddition Reactions of Aryl Azide/Alkyne Derivatives

Hicham Ben El Ayouchia, Hafid Anan, Moulay Lahcen El Idrissi Moubtassim, Luis R. Domingo, Miguel Julve and Salah-Eddine Stiriba

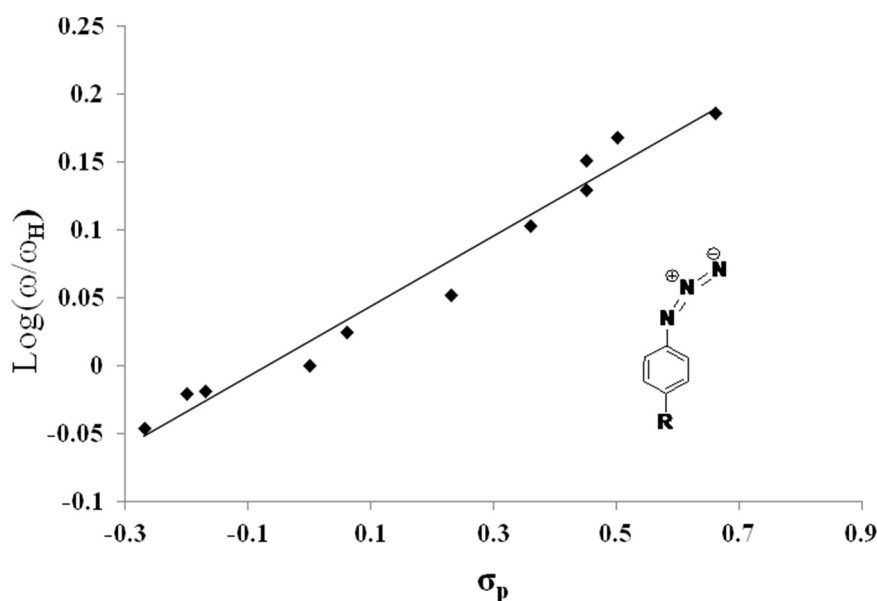

**Figure S1.** Plot of the logarithm of the global electrophilicity ratios of substituted azides versus the  $\sigma_p$  Hammett substituent constants. The value of the regression coefficient for the least-squares fit to a linear plot is  $R^2 = 0.97$ .

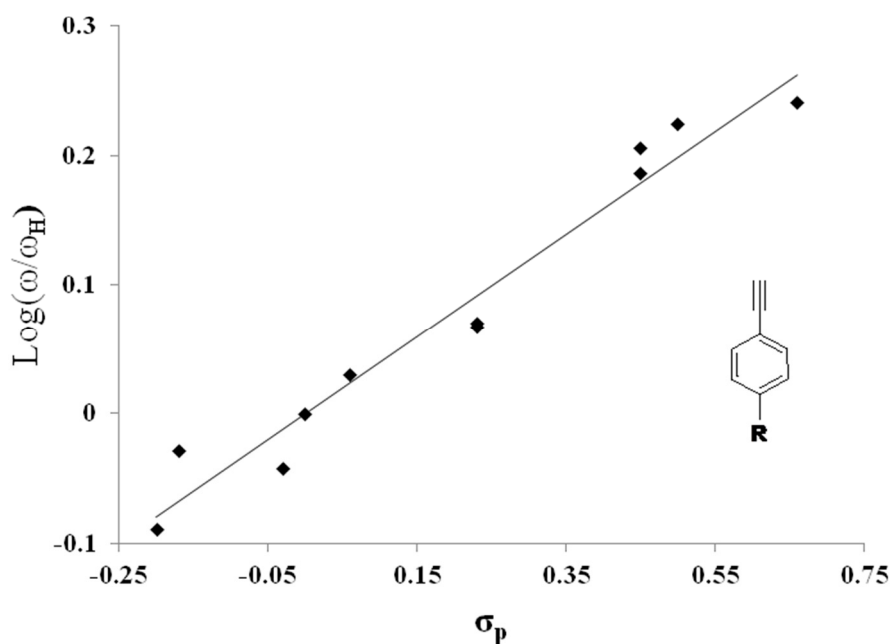

**Figure S2.** Plot of the logarithm of the global electrophilicity ratios of substituted alkynes versus the Hammett  $\sigma_p$  substituent constants. The value of the regression coefficient for the least-squares fit to a linear plot is  $R^2 = 0.96$ .
